# Supplementary material for: Ribosomal protein RPL5 regulates colon cancer cell proliferation and migration through MAPK/ERK signaling pathway
Source: PubMed Central journal article supplement (PMC9670436; doi:10.1186/s12860-022-00448-z), 2022-11-16

Figure 2C

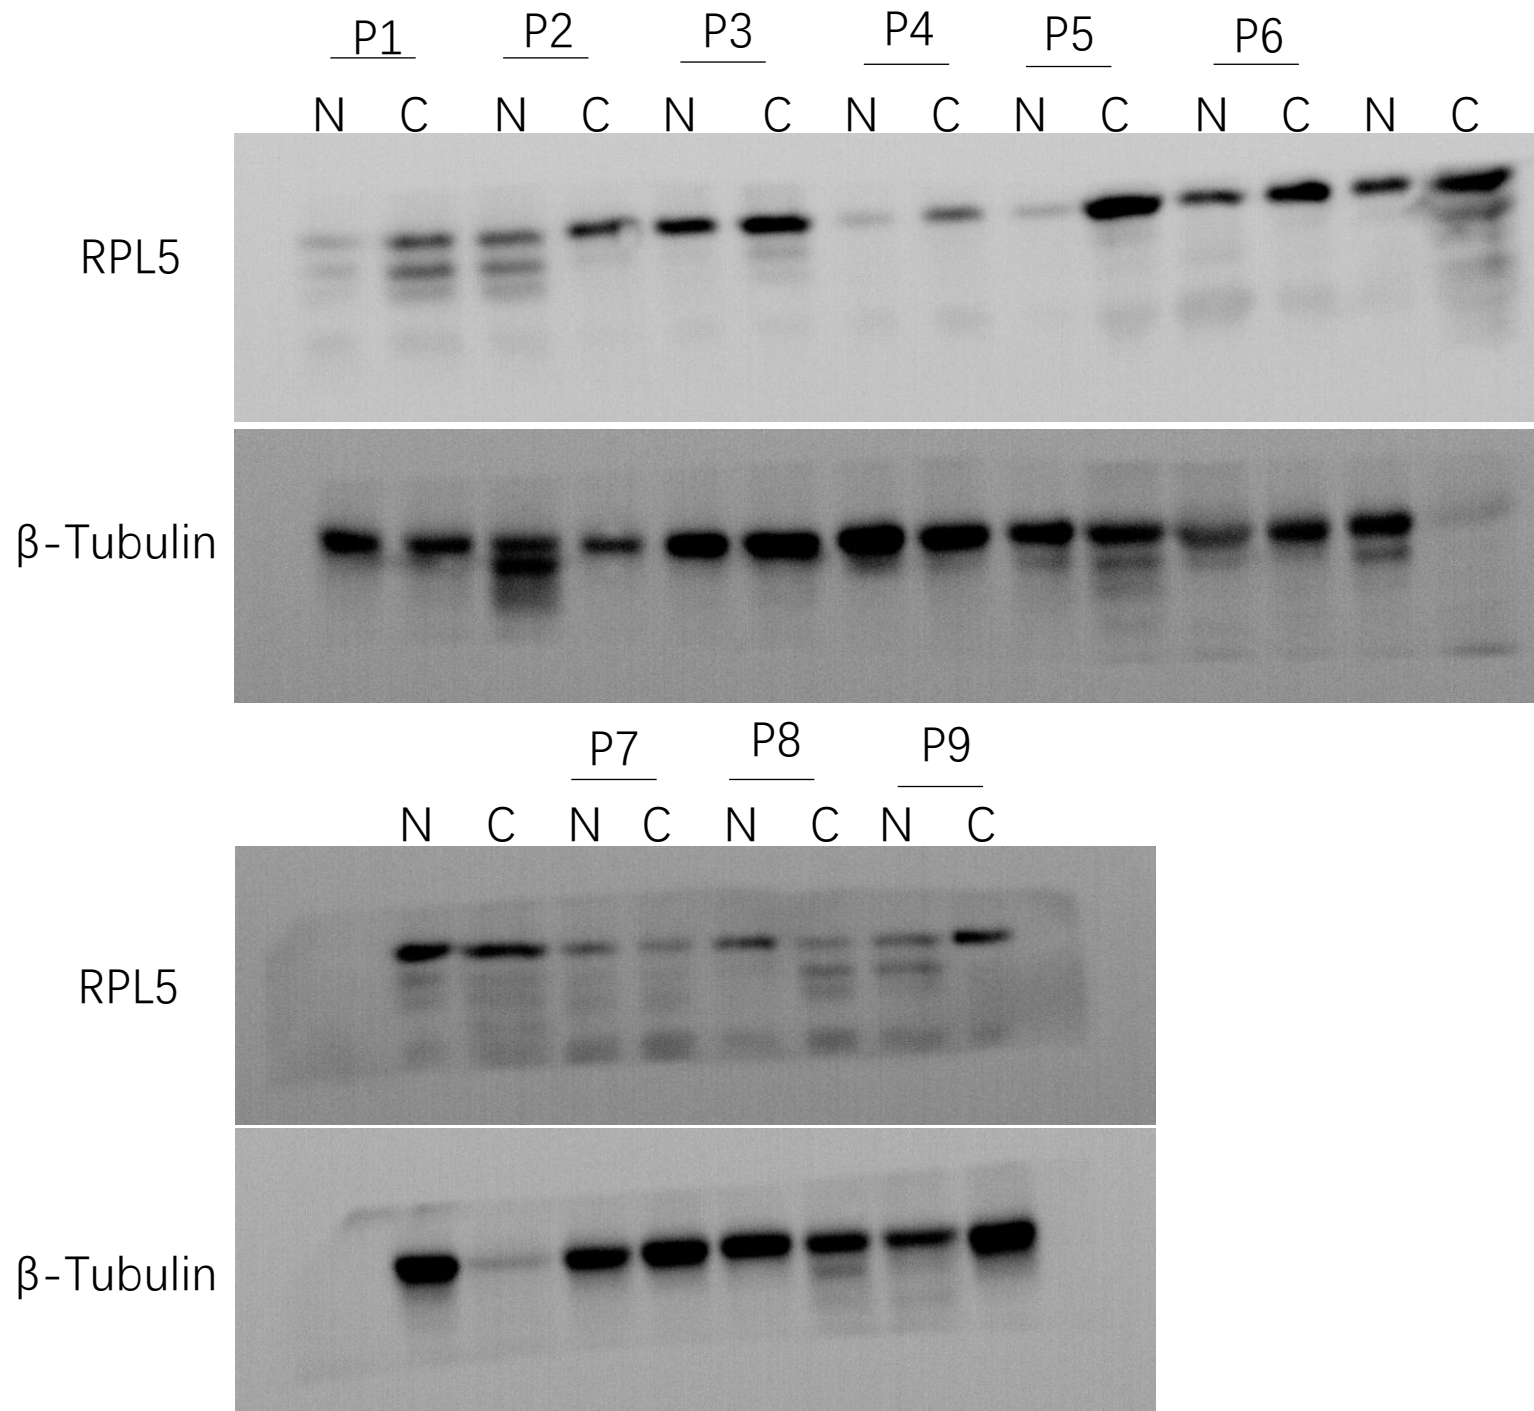

Figure 2D

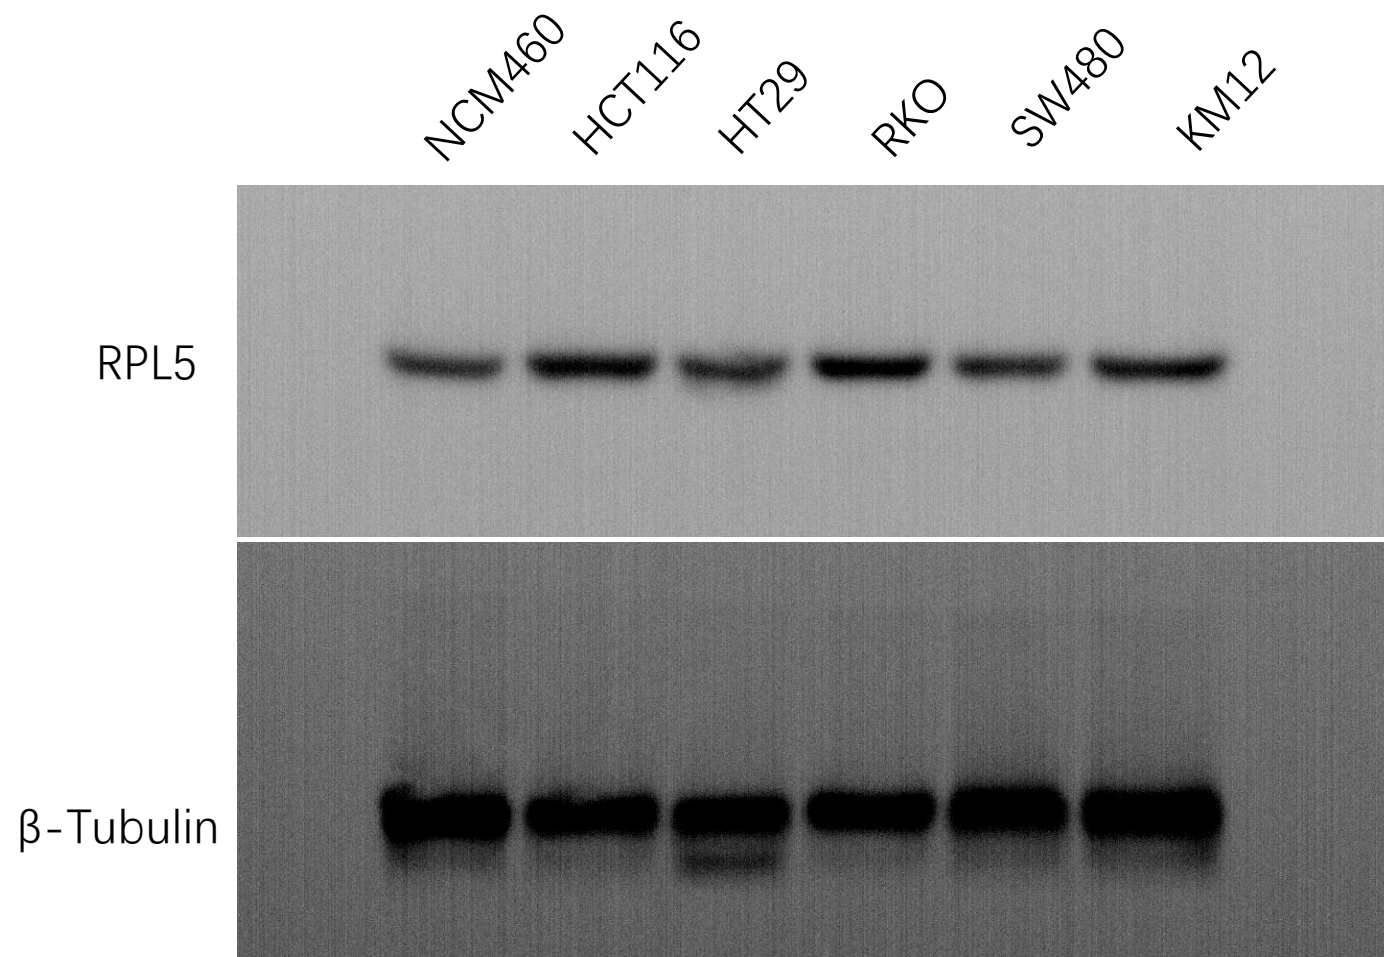

Figure 3A

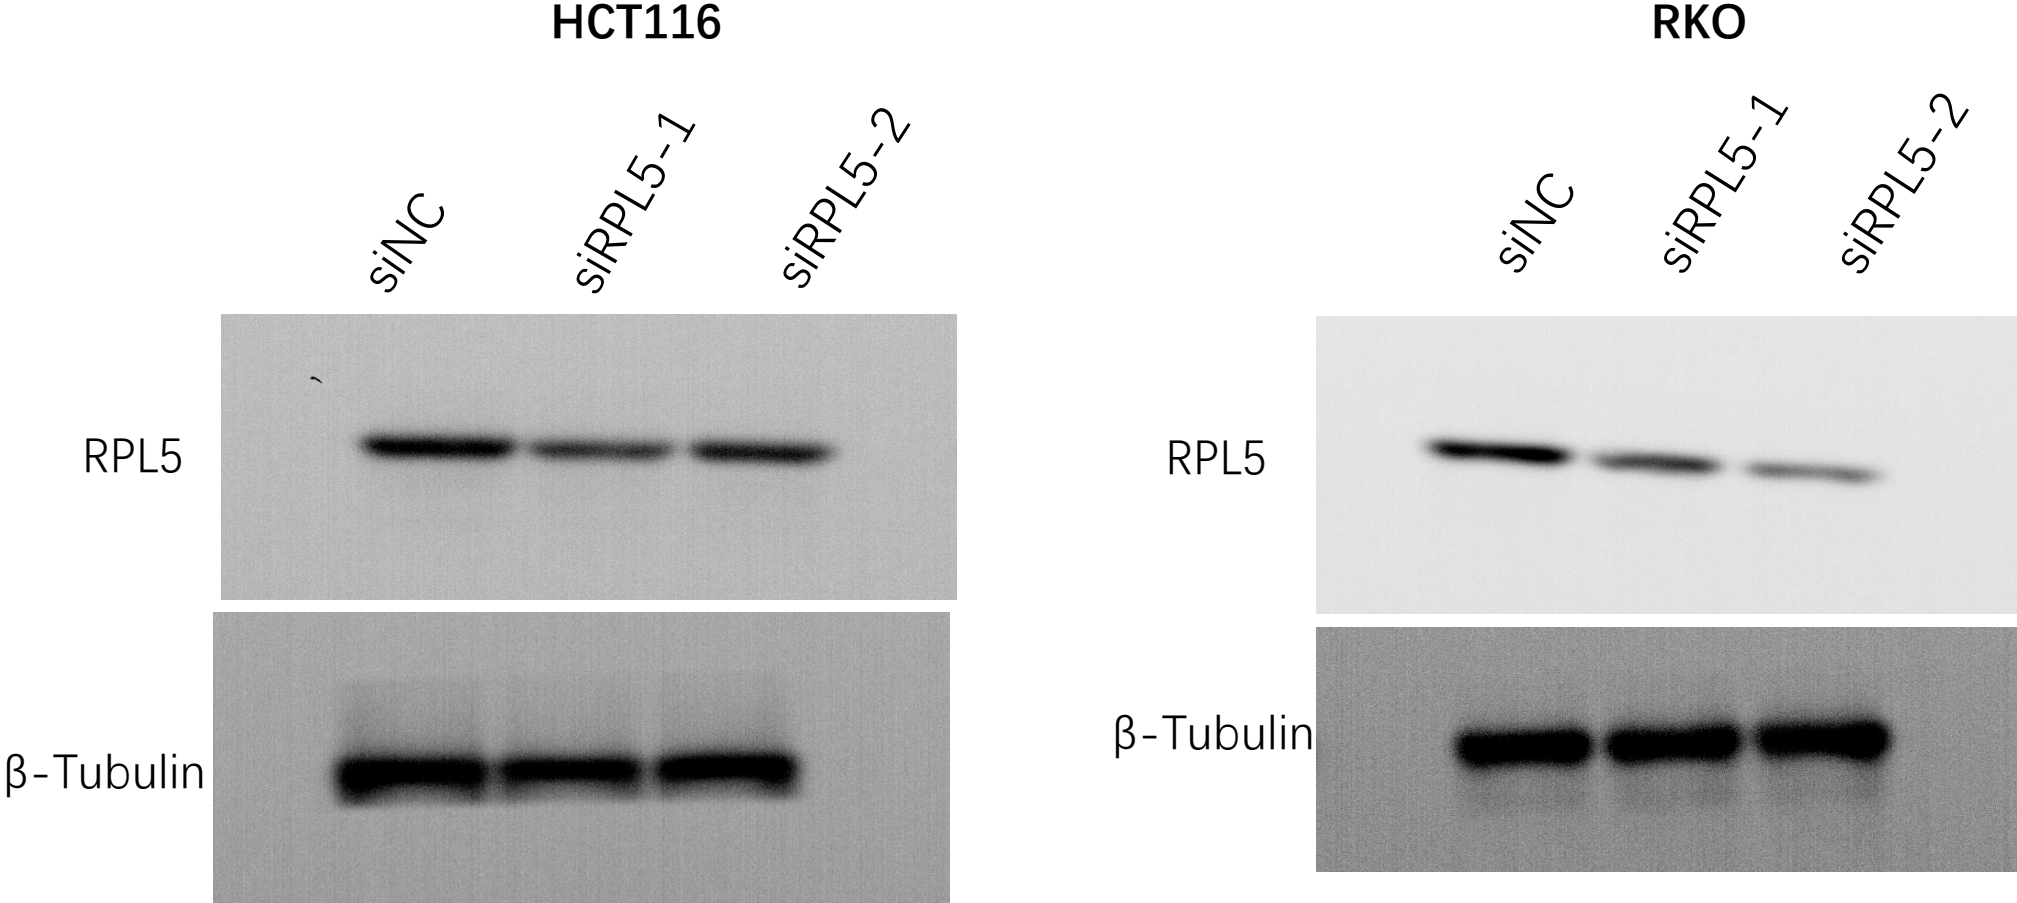

Figure 5B

HCT116

siNC  
siRPL5-1  
siRPL5-2

MMP2

$\beta$ -Tubulin

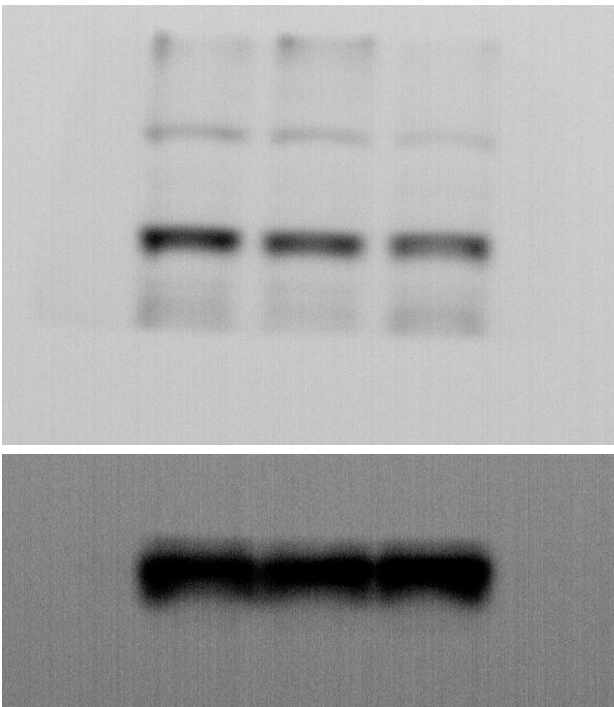

HCT116

siNC  
siRPL5-1  
siRPL5-2

MMP9

$\beta$ -Tubulin

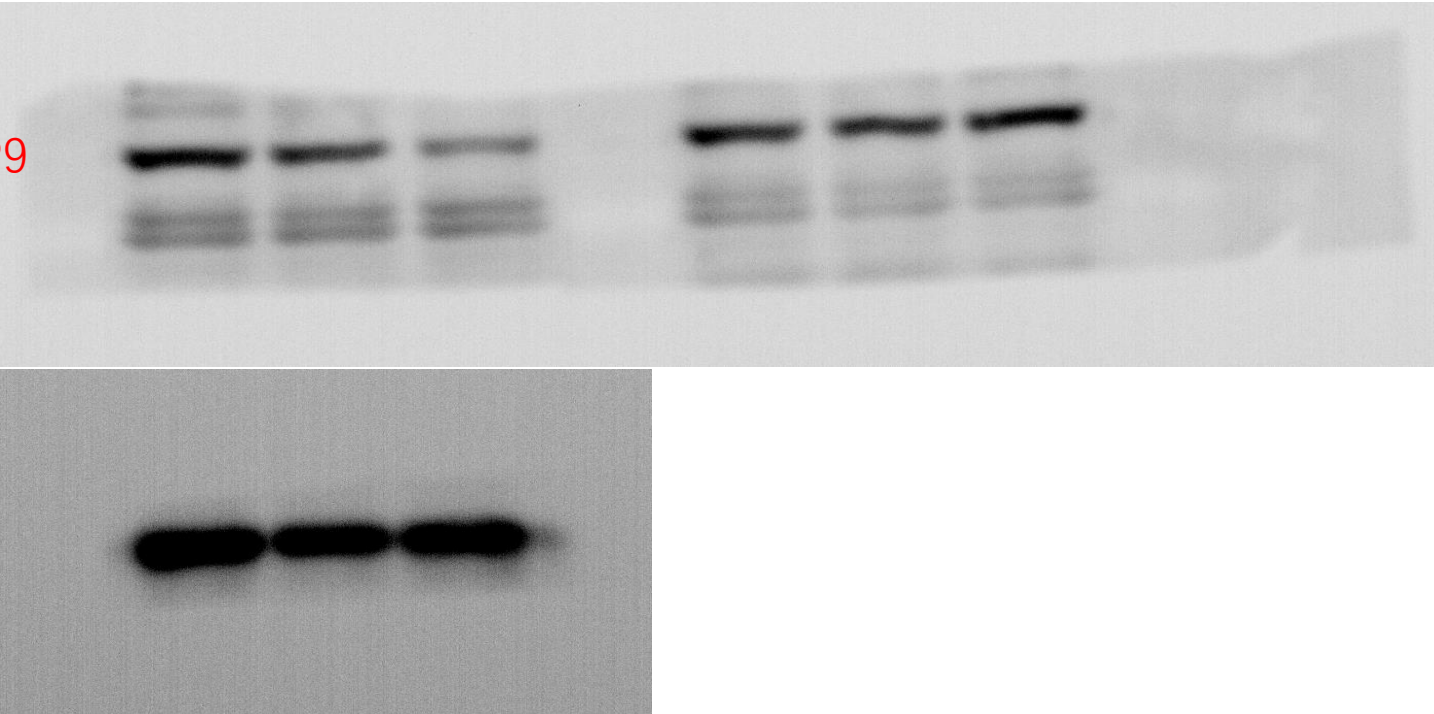

Figure 5B

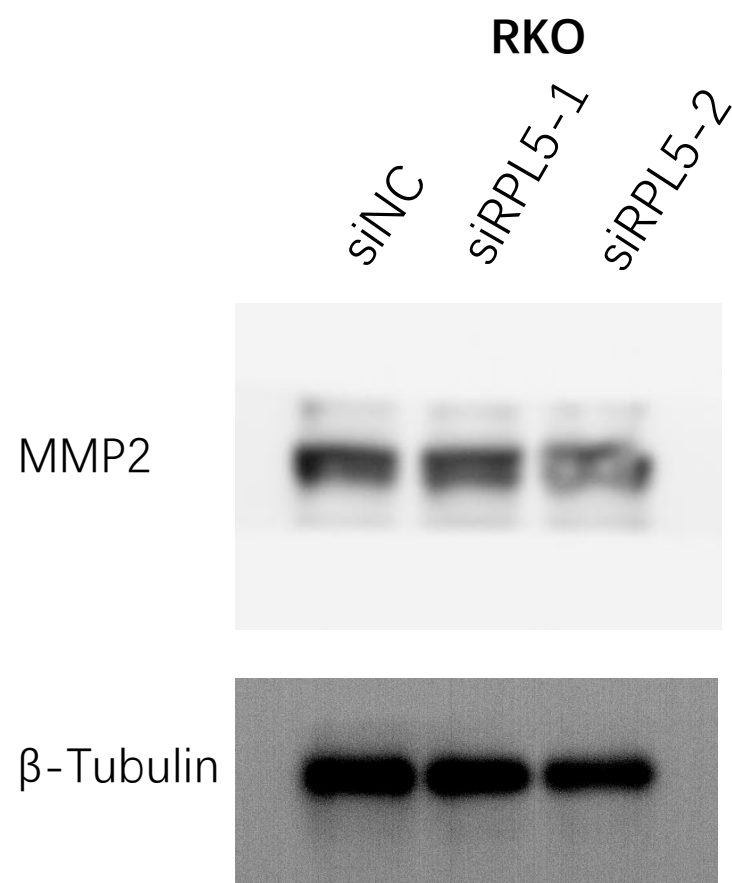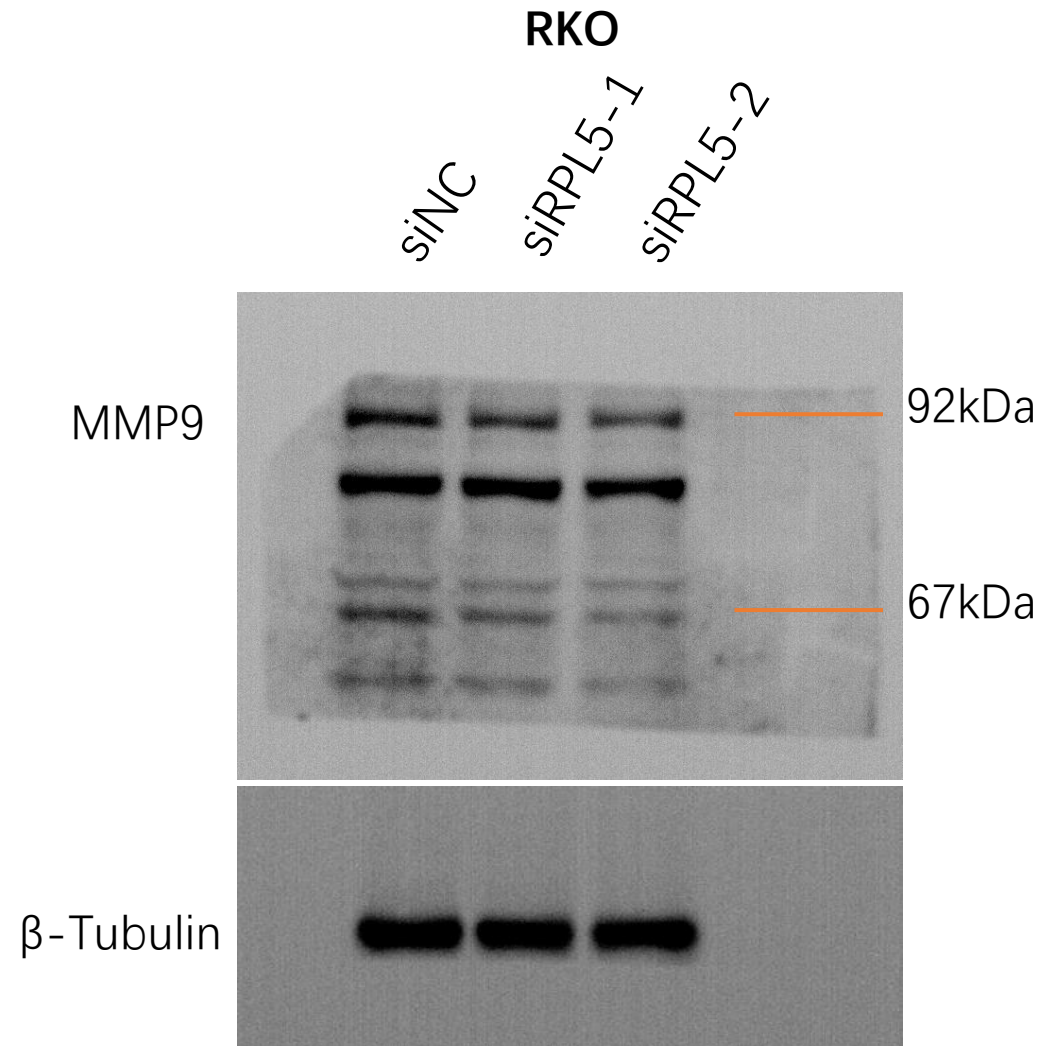

Figure 6B

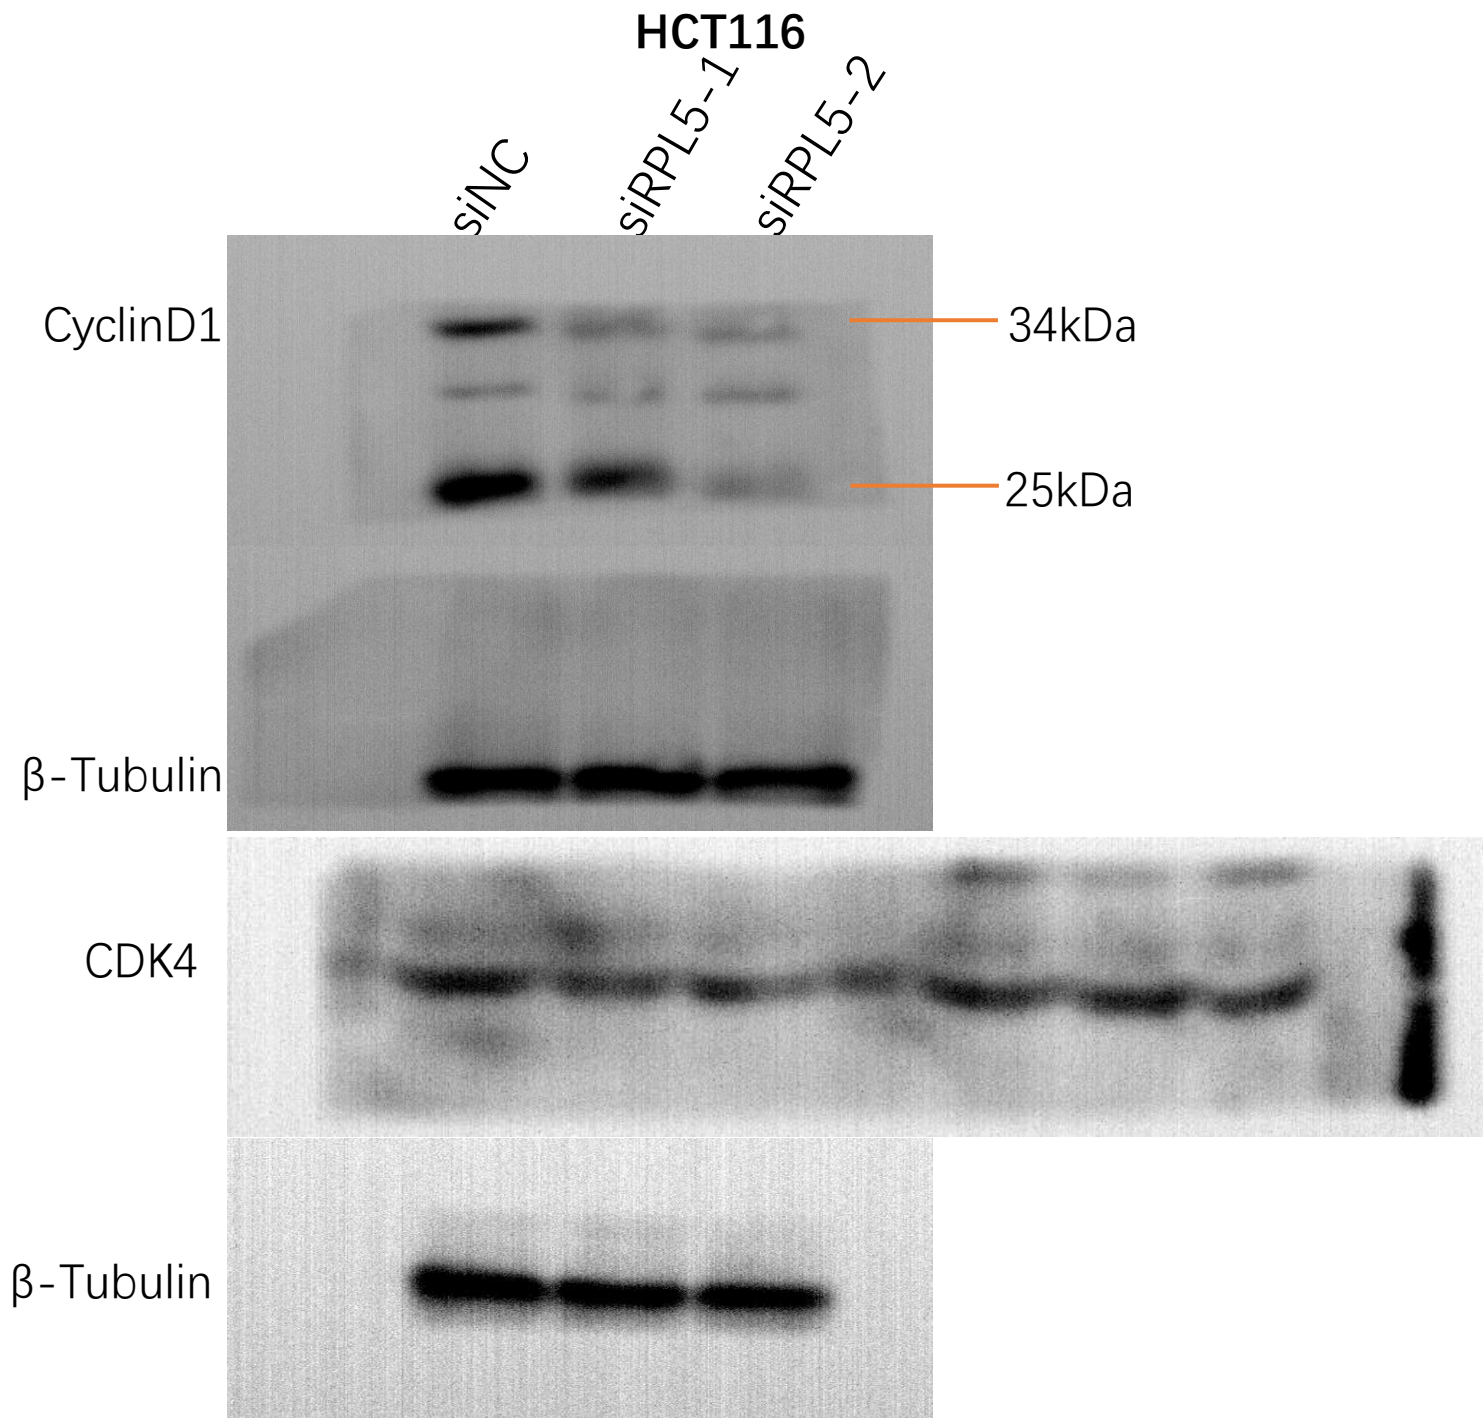

Figure 6B

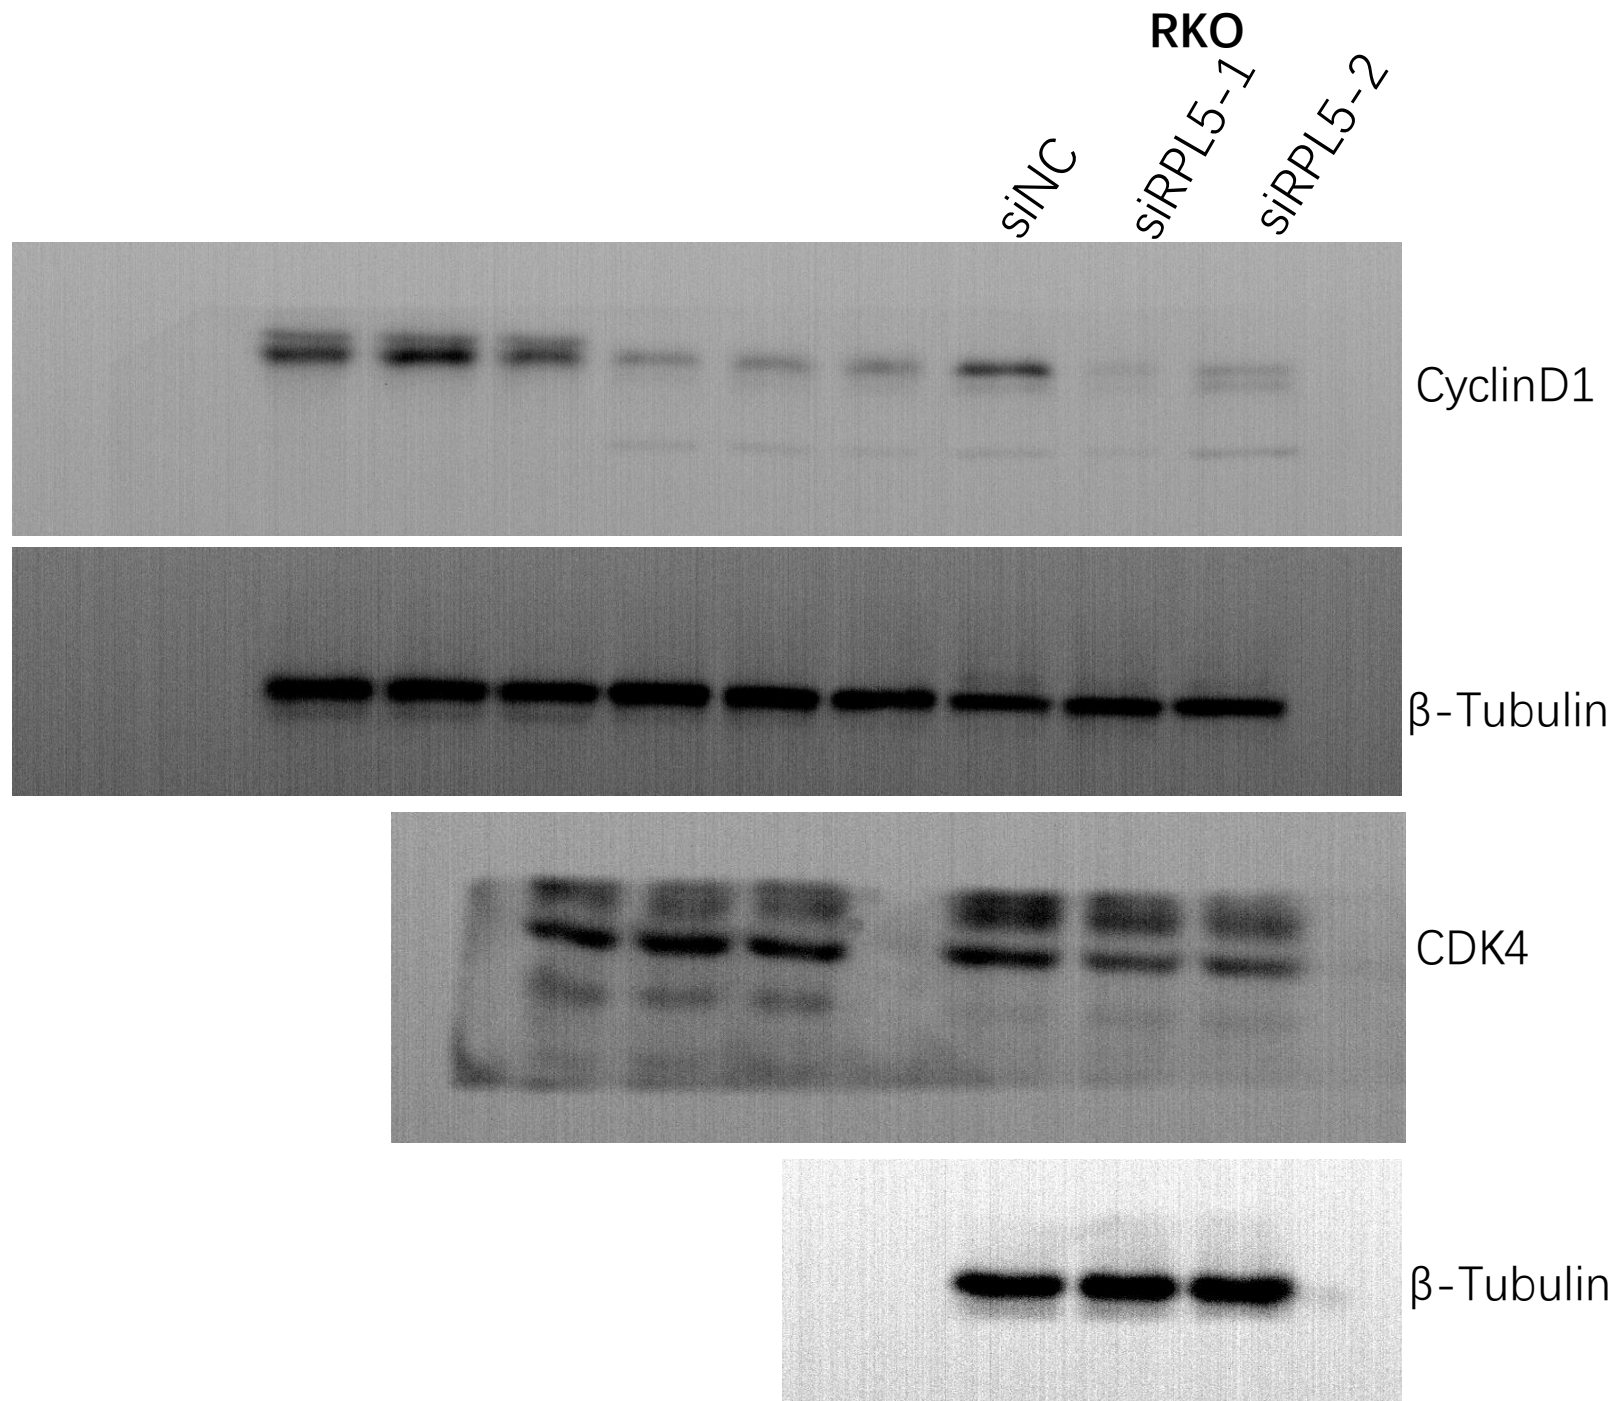

Figure 7A

**HCT116**

**RKO**

*siNC*      *siRPL5-1*      *siRPL5-2*

*siNC*      *siRPL5-1*      *siRPL5-2*

p-MEK1/2

MEK1/2

$\beta$ -Tubulin

p-ERK1/2

ERK1/2

$\beta$ -Tubulin

p-MEK1/2

MEK1/2

$\beta$ -Tubulin

p-ERK1/2

ERK1/2

$\beta$ -Tubulin

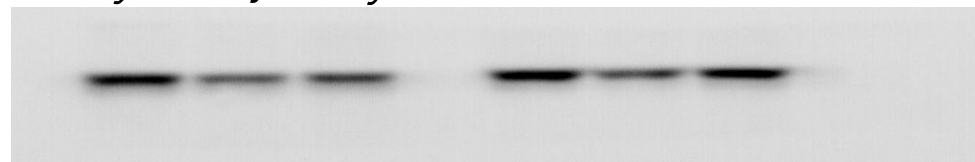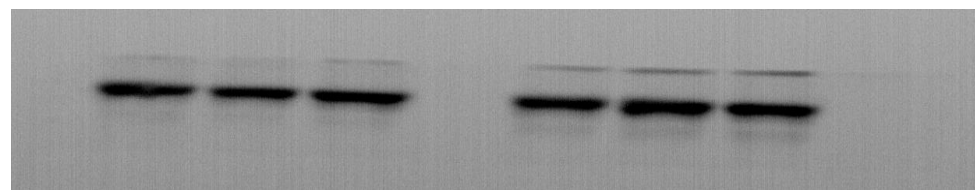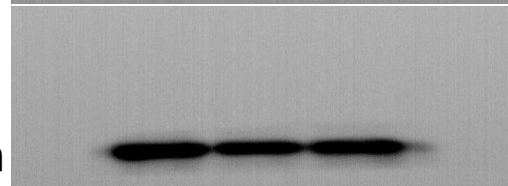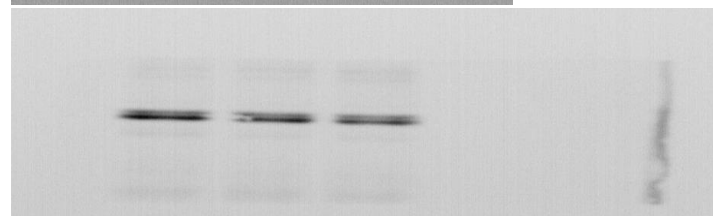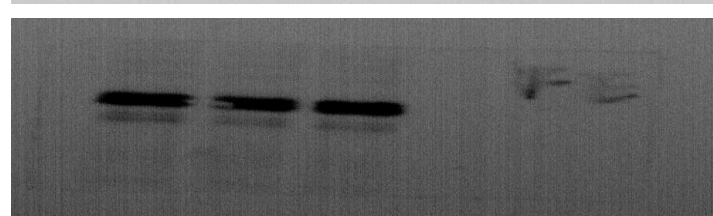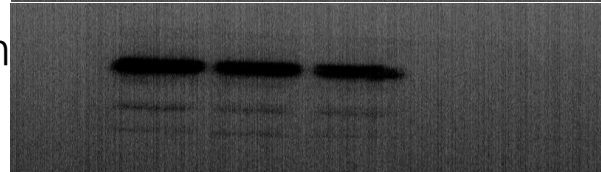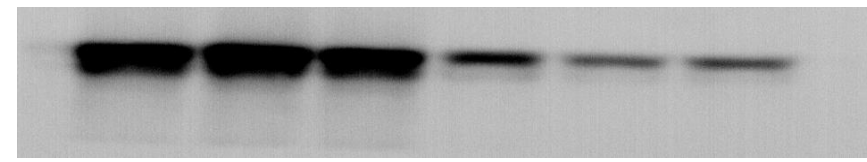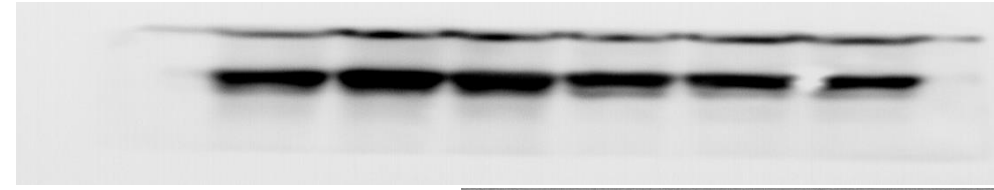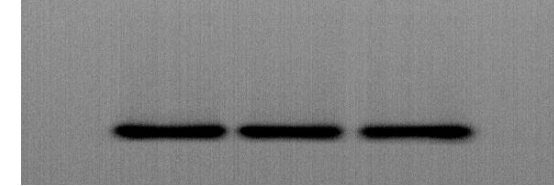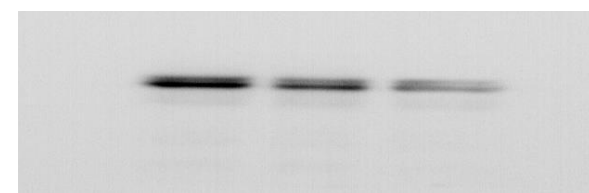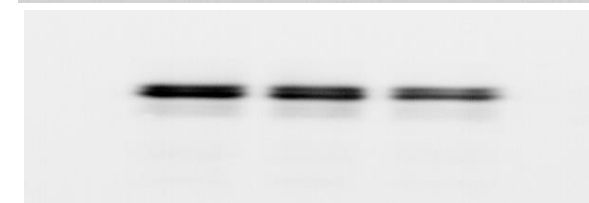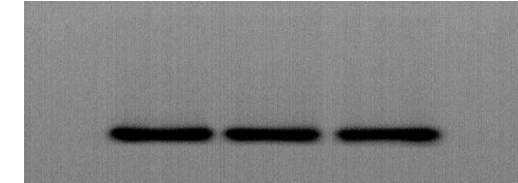



Figure 7A

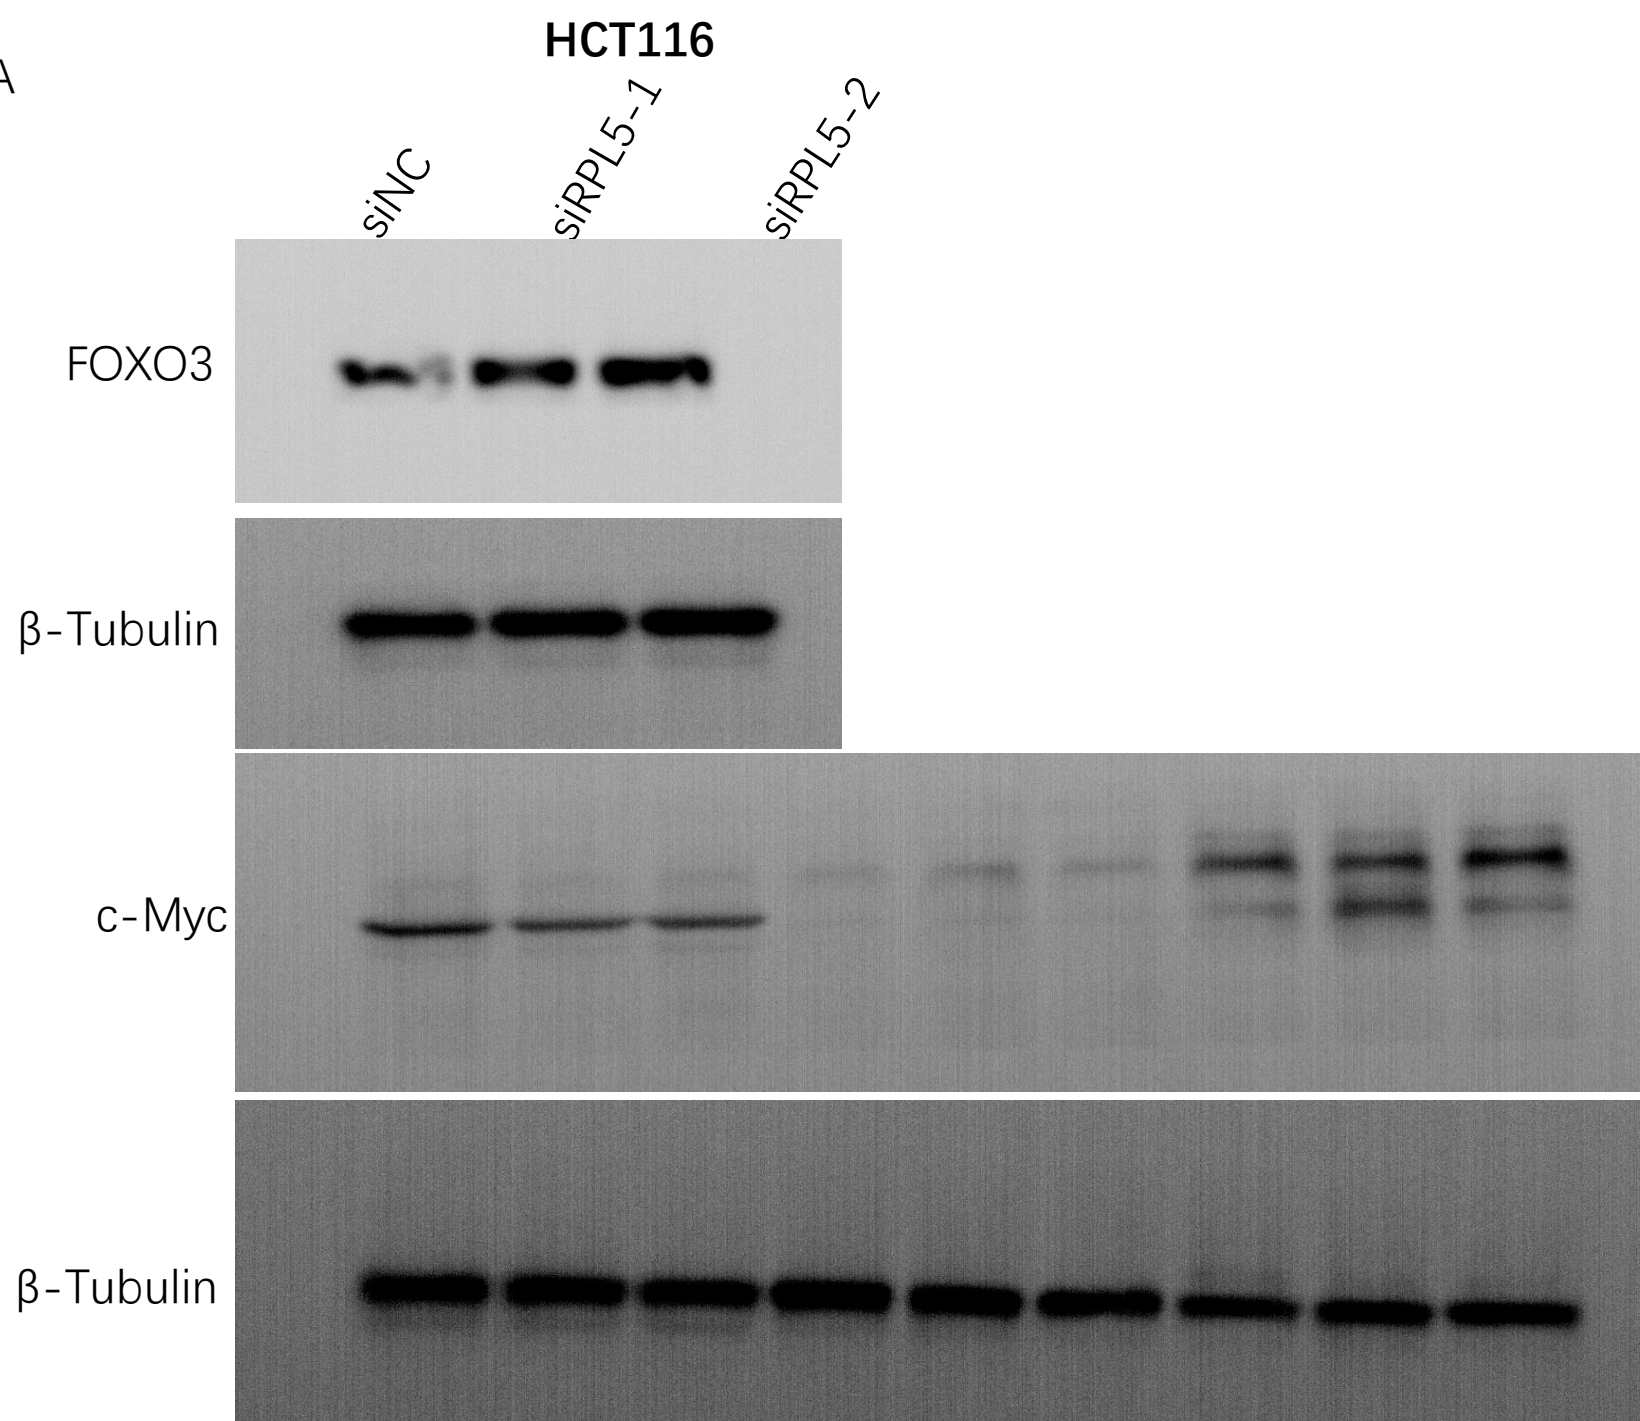

Figure 7A

RKO

siNC

siRPL5-1

siRPL5-2

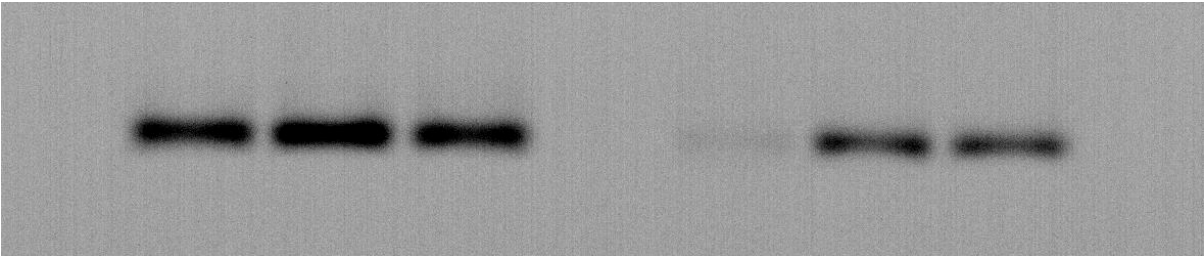

FOXO3

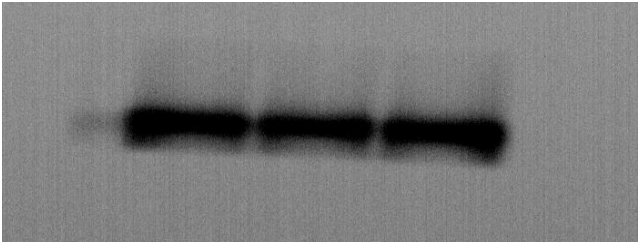

$\beta$ -Tubulin

49kDa

40kDa

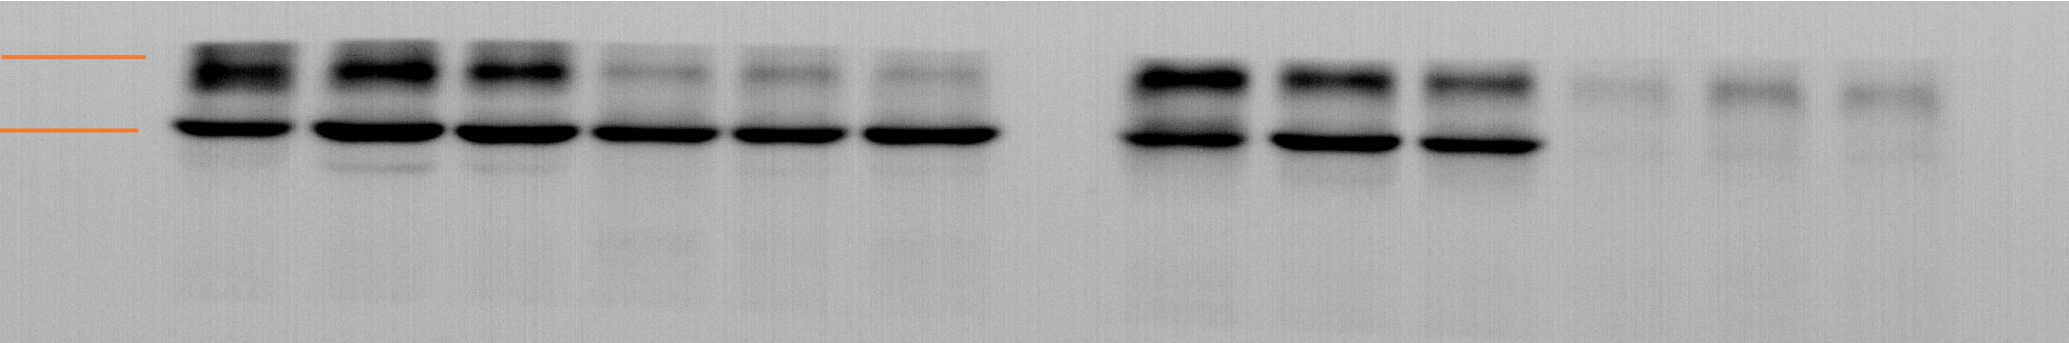

c-Myc

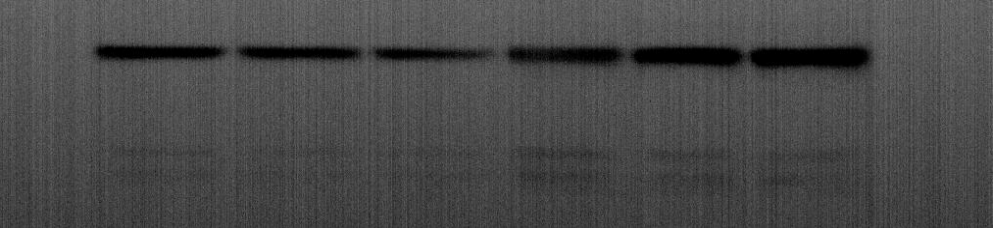

$\beta$ -Tubulin

Figure 7B

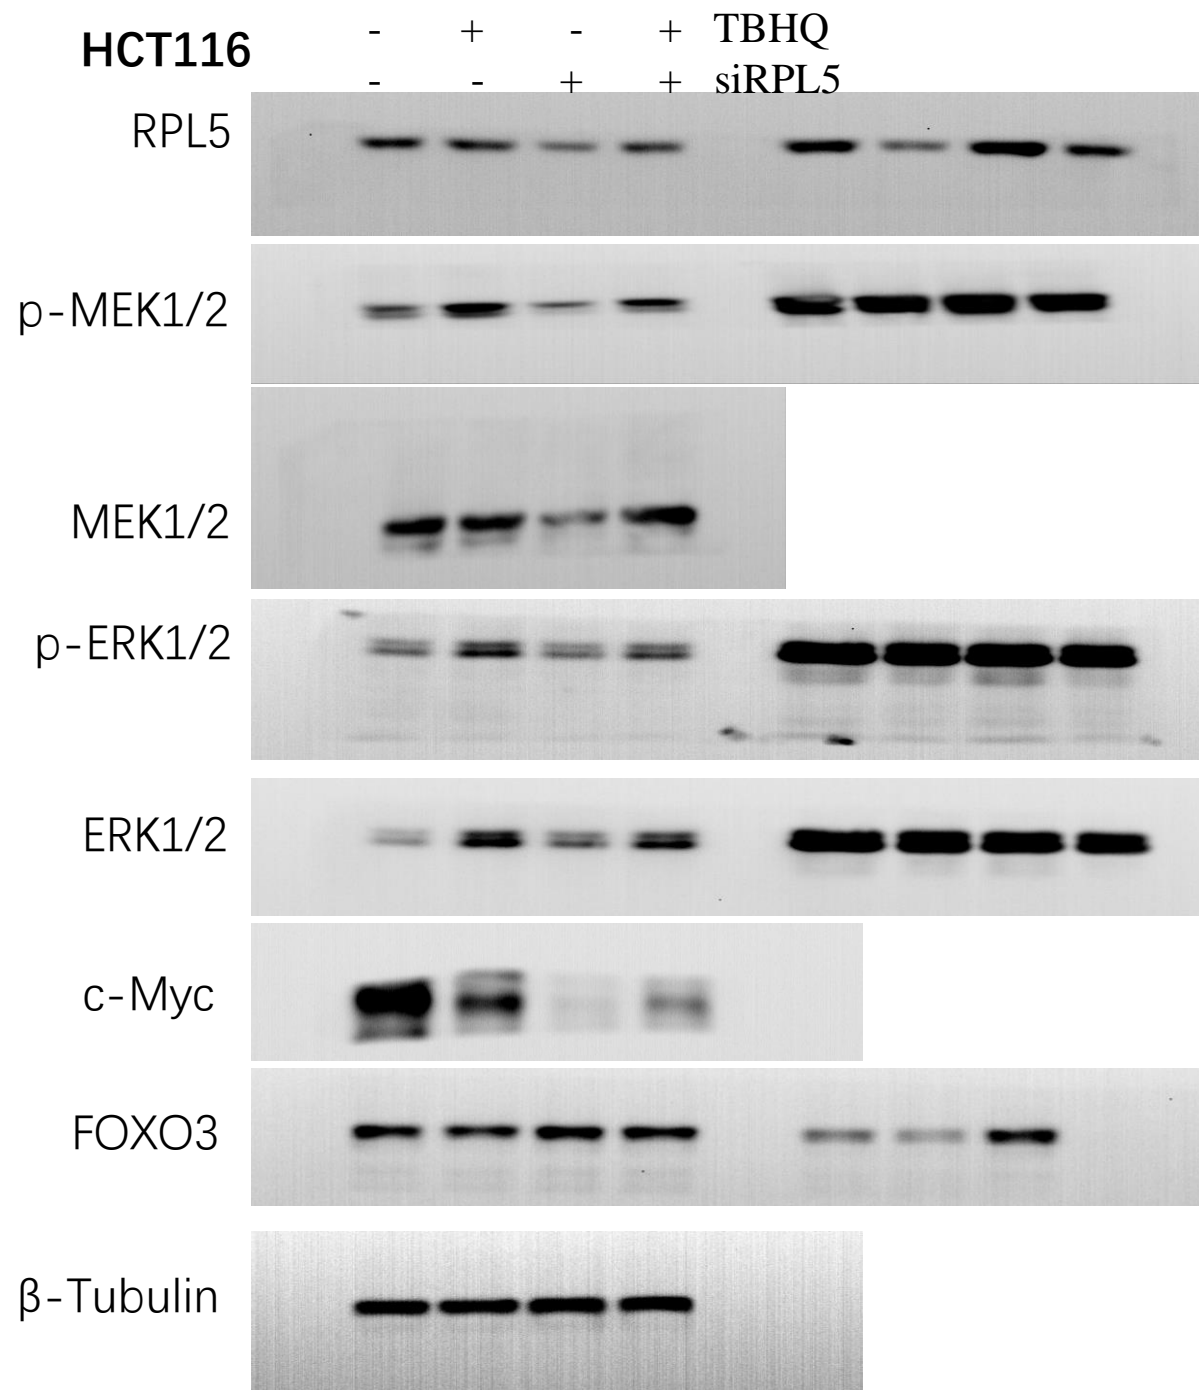

Figure 7B

RKO

- + - + TBHQ  
- - + + siRPL5

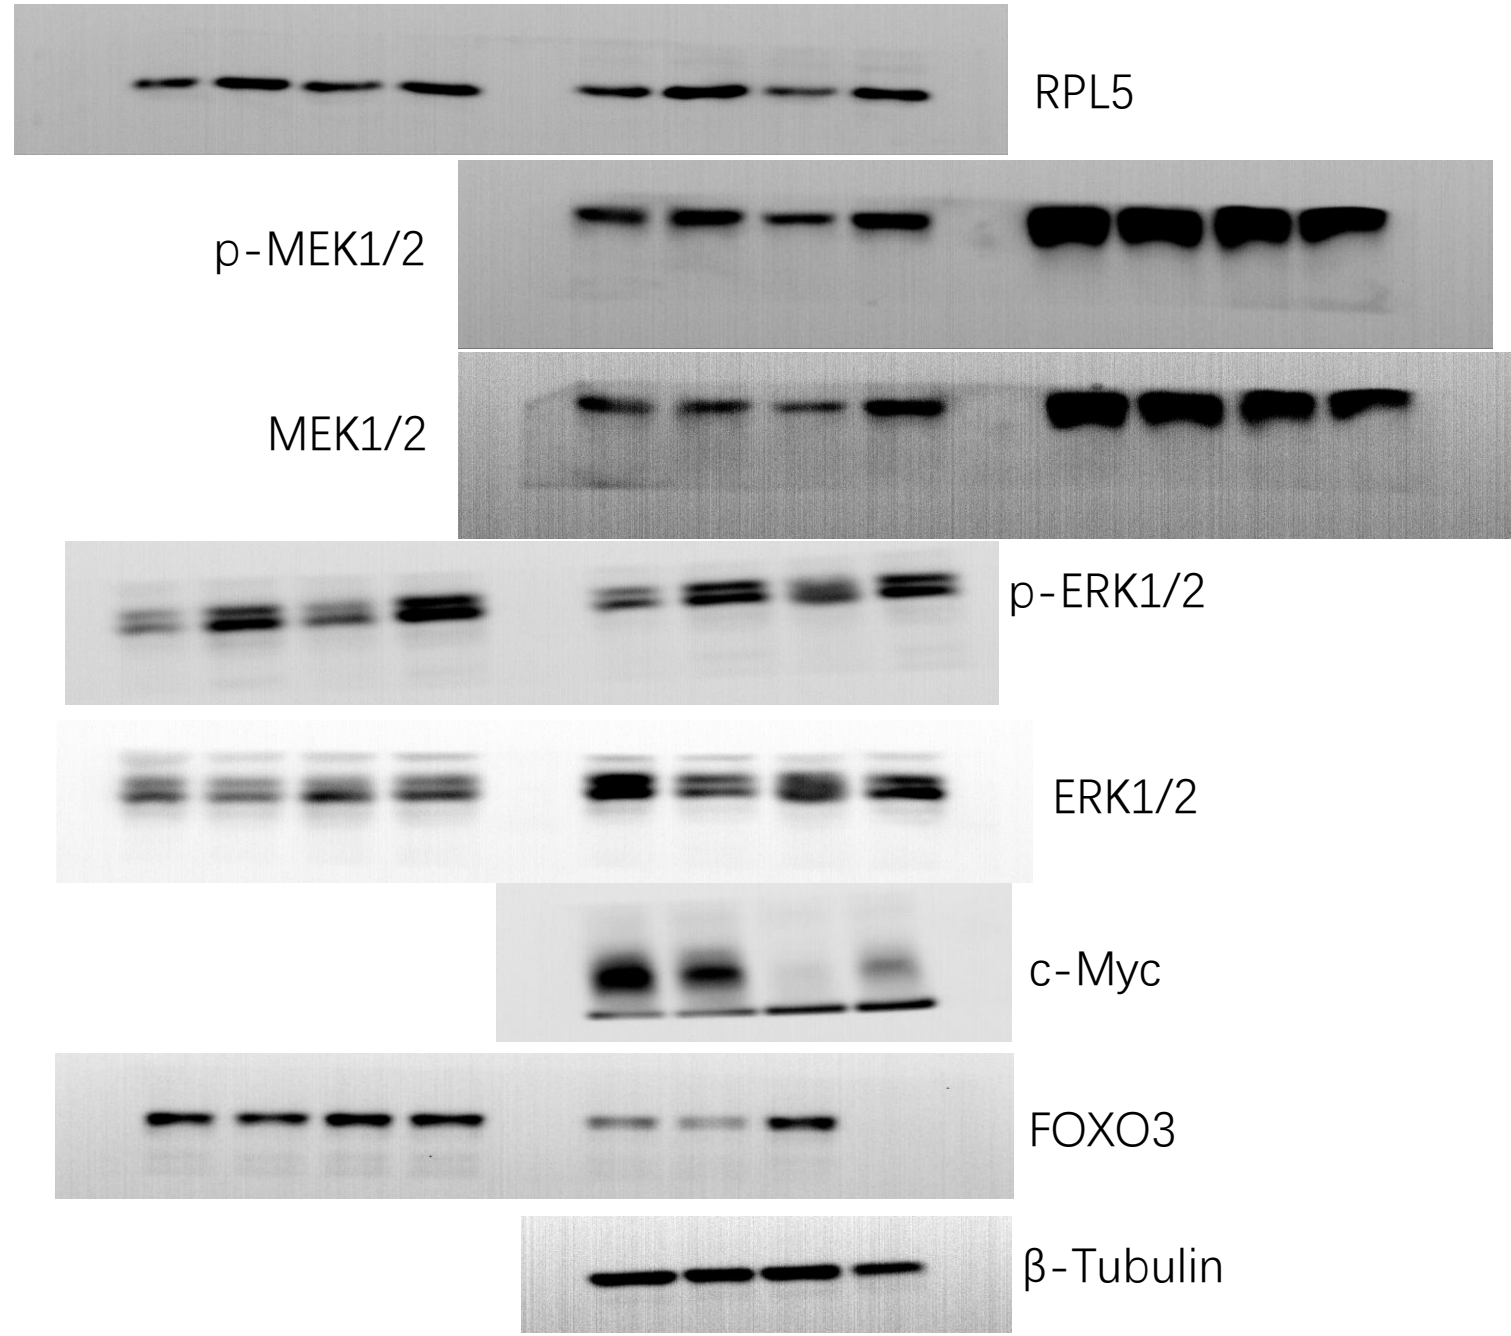

Figure 7E

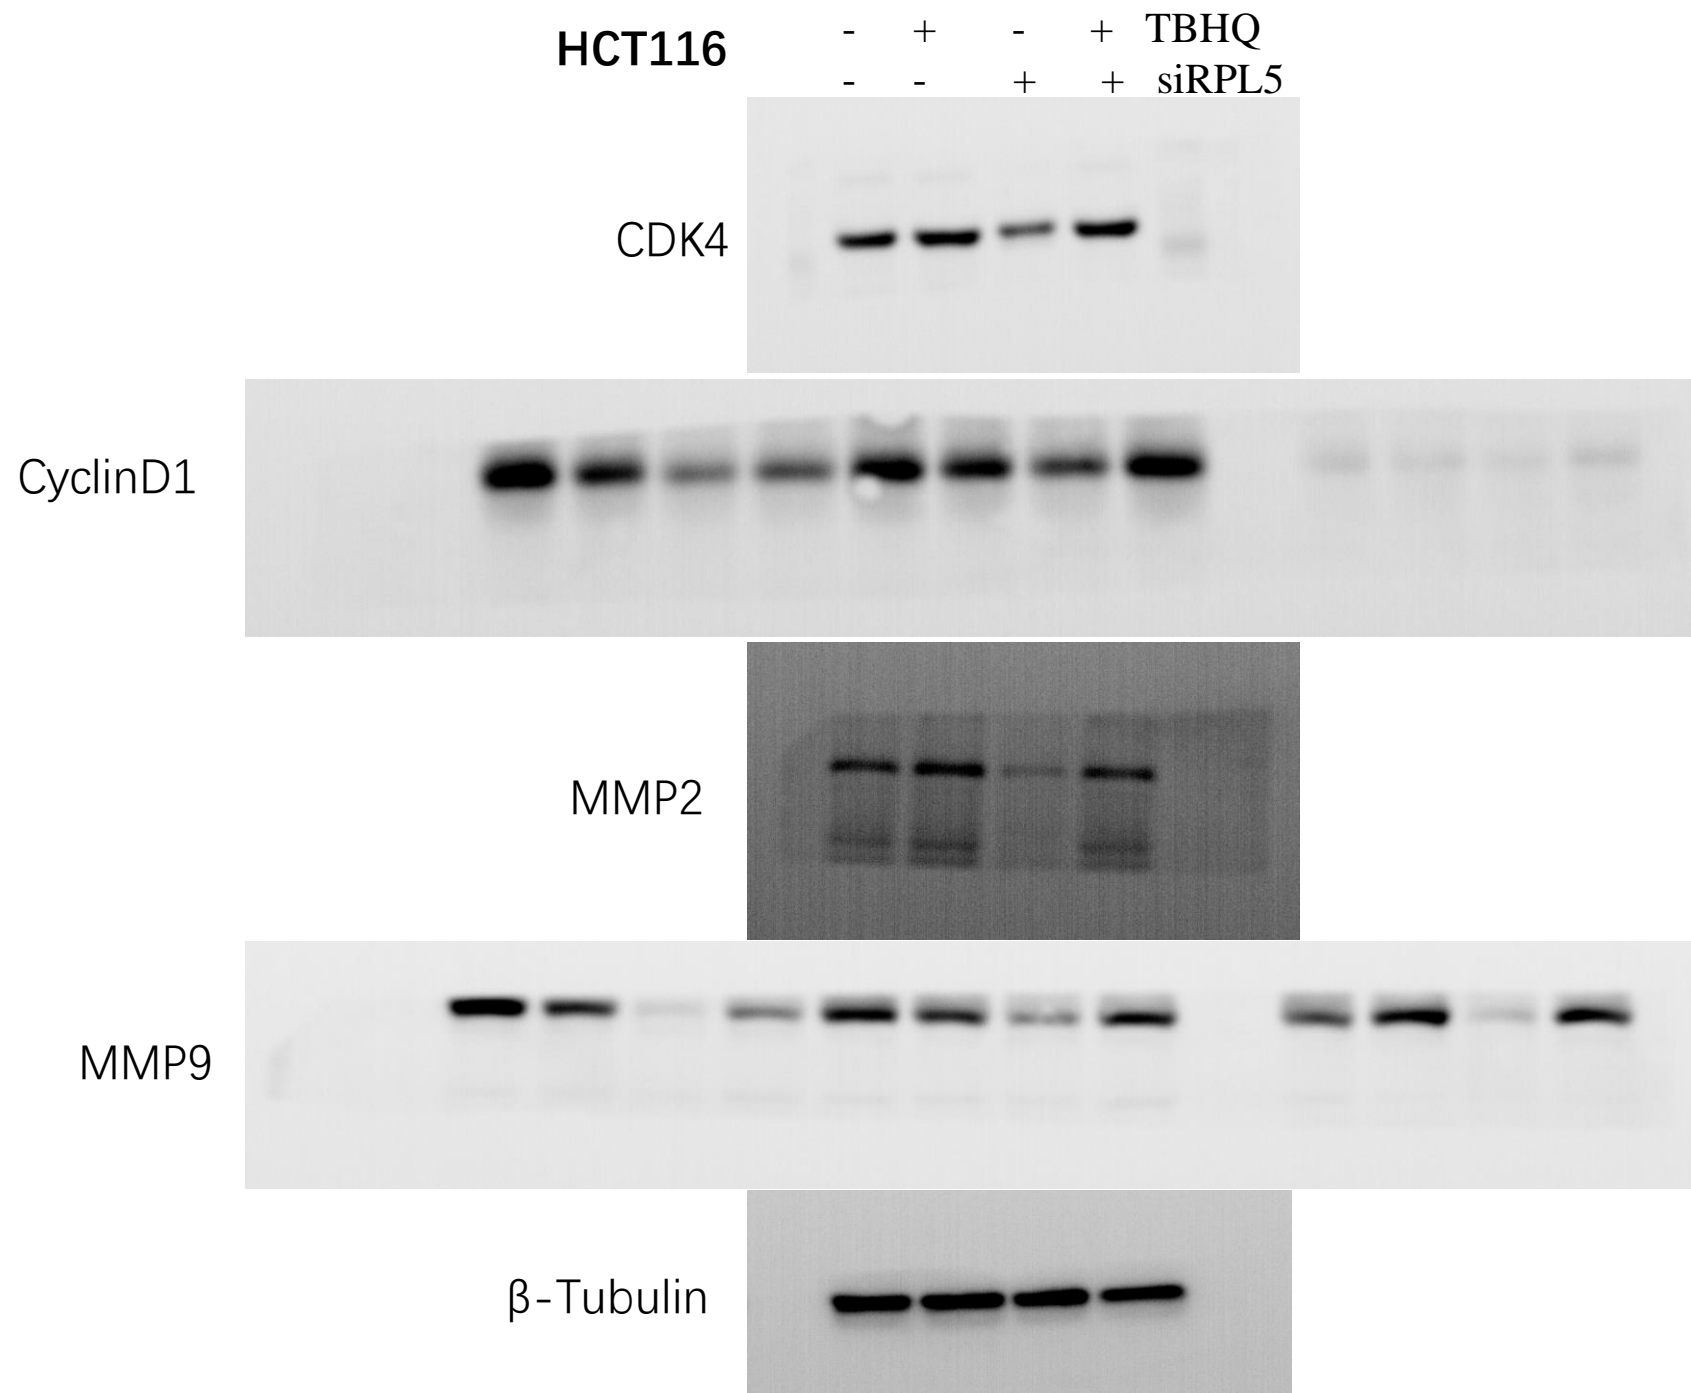

Figure 7E

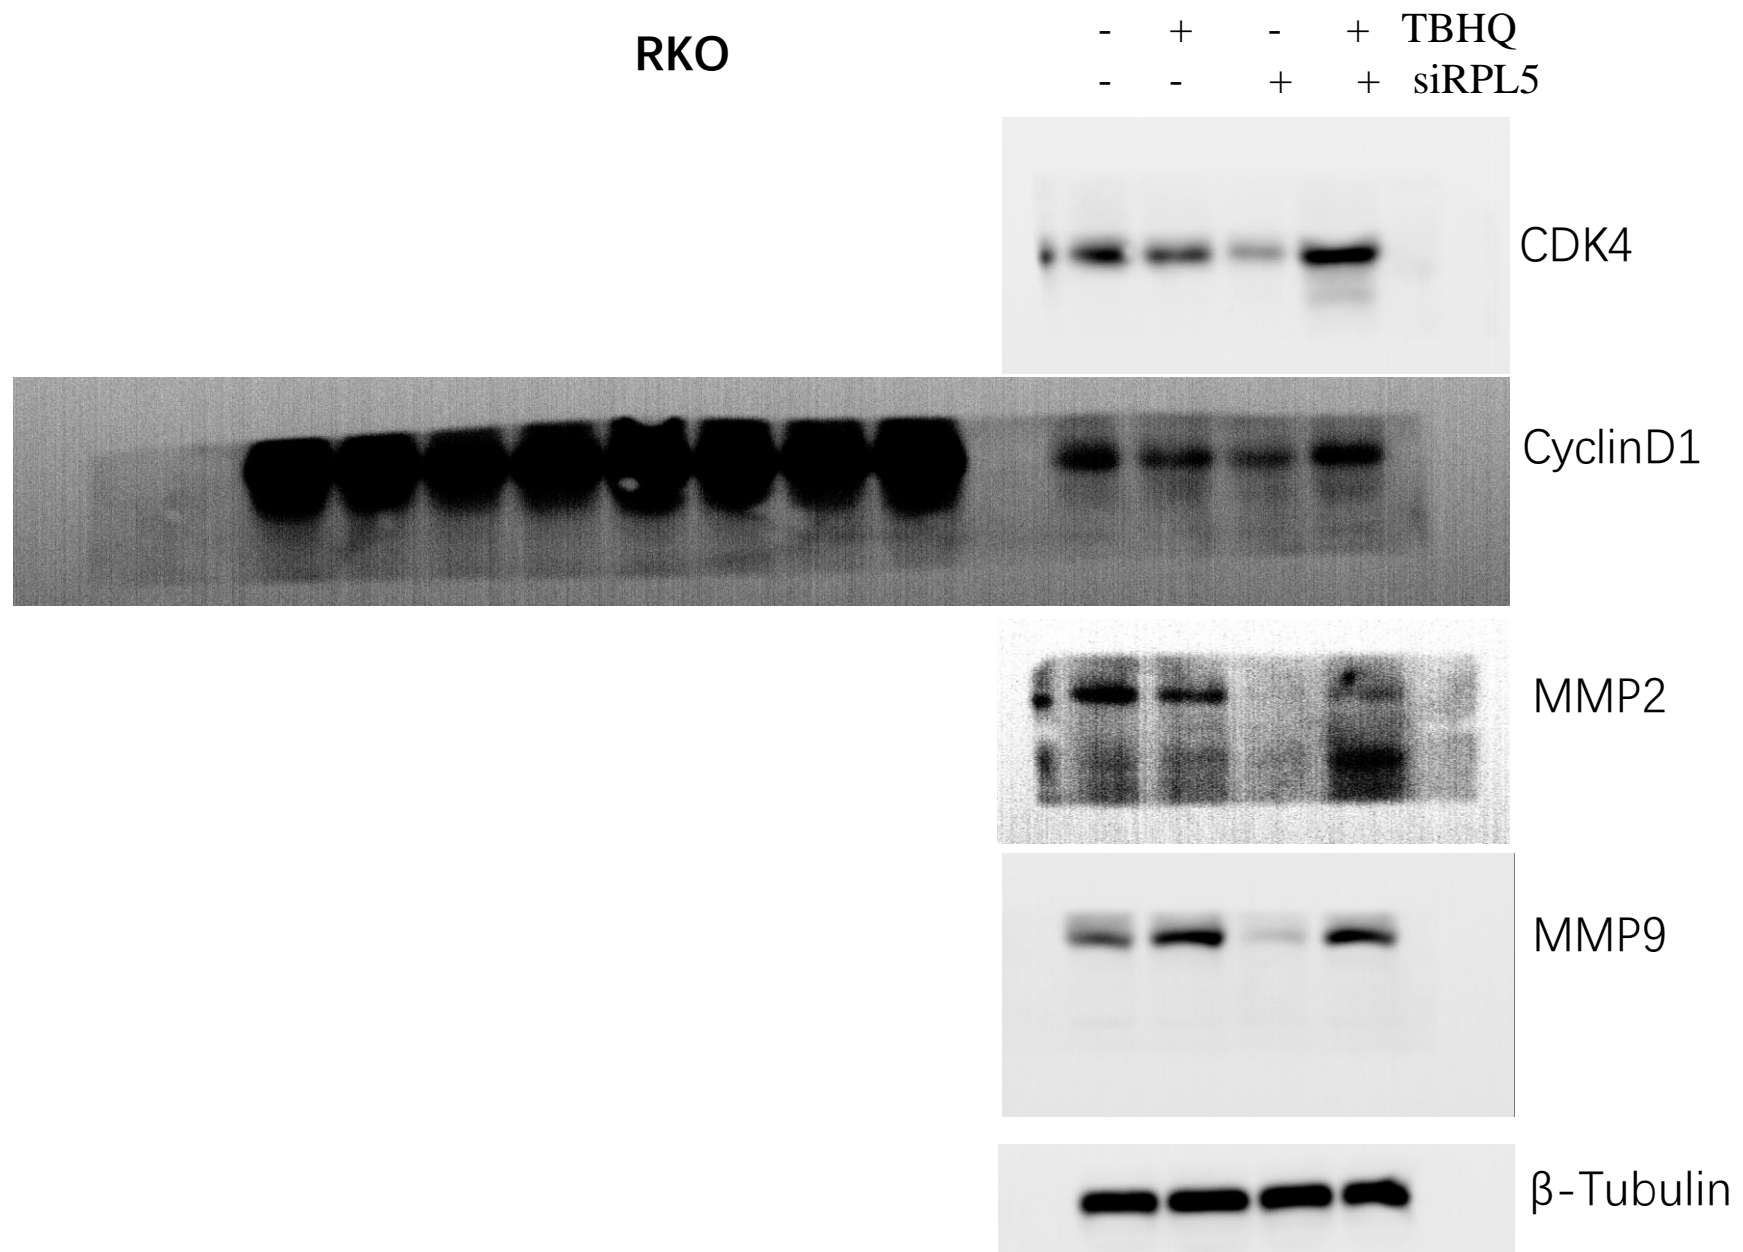

Supplement: 12860_2022_448_MOESM1_ESM.pdf [file 12860_2022_448_MOESM1_ESM.pdf]
